# Supplementary material
Source: publisher site journal article supplement (https://www.dovepress.com/article/595432)
Supplement: Supplementary file 1 [file 595432%20Supplementary%20Material.docx]

**Table S1. Differences in clinical and metabolic indicators among different body composition subgroups**

|  | | | | | | | |
| --- | --- | --- | --- | --- | --- | --- | --- |
|  | (I)Group | (J)Group | (I)Mean | (J)Mean | Mean Difference(I-J) | Standard Error | *p-Value* |
| Age | cluster_1 | cluster_2 | 75.833 | 71.884 | 3.950 | 1.577 | 0.013* |
| cluster_1 | cluster_3 | 75.833 | 73.224 | 2.610 | 1.301 | 0.046* |
| cluster_2 | cluster_3 | 71.884 | 73.224 | -1.340 | 1.693 | 0.429 |
| ALT | cluster_1 | cluster_2 | 18.867 | 22.372 | -3.505 | 1.633 | 0.033* |
| cluster_1 | cluster_3 | 18.867 | 19.908 | -1.041 | 1.347 | 0.440 |
| cluster_2 | cluster_3 | 22.372 | 19.908 | 2.464 | 1.754 | 0.161 |
| AST | cluster_1 | cluster_2 | 25.258 | 25.000 | 0.258 | 1.377 | 0.851 |
| cluster_1 | cluster_3 | 25.258 | 24.303 | 0.956 | 1.136 | 0.401 |
| cluster_2 | cluster_3 | 25.000 | 24.303 | 0.697 | 1.478 | 0.638 |
| Total Bilirubin | cluster_1 | cluster_2 | 15.493 | 17.449 | -1.956 | 0.979 | 0.047* |
| cluster_1 | cluster_3 | 15.493 | 18.525 | -3.033 | 0.808 | 0.000** |
| cluster_2 | cluster_3 | 17.449 | 18.525 | -1.076 | 1.051 | 0.307 |
| Direct Bilirubin | cluster_1 | cluster_2 | 1.860 | 2.047 | -0.187 | 0.169 | 0.271 |
| cluster_1 | cluster_3 | 1.860 | 2.120 | -0.260 | 0.139 | 0.064 |
| cluster_2 | cluster_3 | 2.047 | 2.120 | -0.073 | 0.181 | 0.687 |
| ALP | cluster_1 | cluster_2 | 80.633 | 77.651 | 2.982 | 3.377 | 0.378 |
| cluster_1 | cluster_3 | 80.633 | 73.263 | 7.370 | 2.785 | 0.009** |
| cluster_2 | cluster_3 | 77.651 | 73.263 | 4.388 | 3.625 | 0.227 |
| Total Protein | cluster_1 | cluster_2 | 72.358 | 72.747 | -0.389 | 0.732 | 0.596 |
| cluster_1 | cluster_3 | 72.358 | 72.292 | 0.065 | 0.604 | 0.914 |
| cluster_2 | cluster_3 | 72.747 | 72.292 | 0.454 | 0.786 | 0.564 |
| Albumin | cluster_1 | cluster_2 | 44.065 | 44.847 | -0.782 | 0.423 | 0.066 |
| cluster_1 | cluster_3 | 44.065 | 44.688 | -0.623 | 0.349 | 0.075 |
| cluster_2 | cluster_3 | 44.847 | 44.688 | 0.158 | 0.454 | 0.728 |
| GGT | cluster_1 | cluster_2 | 22.433 | 26.721 | -4.288 | 2.015 | 0.034* |
| cluster_1 | cluster_3 | 22.433 | 21.842 | 0.591 | 1.662 | 0.722 |
| cluster_2 | cluster_3 | 26.721 | 21.842 | 4.879 | 2.164 | 0.025* |
| Globulin | cluster_1 | cluster_2 | 28.350 | 27.930 | 0.420 | 0.702 | 0.550 |
| cluster_1 | cluster_3 | 28.350 | 27.658 | 0.692 | 0.579 | 0.233 |
| cluster_2 | cluster_3 | 27.930 | 27.658 | 0.272 | 0.753 | 0.718 |
| Urea | cluster_1 | cluster_2 | 5.562 | 5.926 | -0.364 | 0.258 | 0.160 |
| cluster_1 | cluster_3 | 5.562 | 5.676 | -0.115 | 0.213 | 0.591 |
| cluster_2 | cluster_3 | 5.926 | 5.676 | 0.249 | 0.277 | 0.369 |
| Creatinine | cluster_1 | cluster_2 | 71.608 | 80.837 | -9.229 | 1.994 | 0.000** |
| cluster_1 | cluster_3 | 71.608 | 86.105 | -14.497 | 1.645 | 0.000** |
| cluster_2 | cluster_3 | 80.837 | 86.105 | -5.268 | 2.141 | 0.015* |
| Calcium | cluster_1 | cluster_2 | 2.421 | 2.414 | 0.006 | 0.015 | 0.673 |
| cluster_1 | cluster_3 | 2.421 | 2.409 | 0.012 | 0.012 | 0.341 |
| cluster_2 | cluster_3 | 2.414 | 2.409 | 0.005 | 0.016 | 0.734 |
| Phosphorus | cluster_1 | cluster_2 | 1.159 | 1.097 | 0.063 | 0.024 | 0.011* |
| cluster_1 | cluster_3 | 1.159 | 1.052 | 0.108 | 0.020 | 0.000** |
| cluster_2 | cluster_3 | 1.097 | 1.052 | 0.045 | 0.026 | 0.086 |
| Uric Acid | cluster_1 | cluster_2 | 312.017 | 362.884 | -50.867 | 13.117 | 0.000** |
| cluster_1 | cluster_3 | 312.017 | 365.066 | -53.049 | 10.820 | 0.000** |
| cluster_2 | cluster_3 | 362.884 | 365.066 | -2.182 | 14.083 | 0.877 |
| eGFR | cluster_1 | cluster_2 | 72.992 | 77.233 | -4.241 | 2.046 | 0.039* |
| cluster_1 | cluster_3 | 72.992 | 75.118 | -2.127 | 1.688 | 0.209 |
| cluster_2 | cluster_3 | 77.233 | 75.118 | 2.114 | 2.194 | 0.336 |
| Total Cholesterol | cluster_1 | cluster_2 | 4.756 | 4.555 | 0.200 | 0.164 | 0.223 |
| cluster_1 | cluster_3 | 4.756 | 4.495 | 0.261 | 0.135 | 0.055 |
| cluster_2 | cluster_3 | 4.555 | 4.495 | 0.060 | 0.176 | 0.732 |
| Triglycerides | cluster_1 | cluster_2 | 1.426 | 2.162 | -0.736 | 0.151 | 0.000** |
| cluster_1 | cluster_3 | 1.426 | 1.380 | 0.046 | 0.124 | 0.711 |
| cluster_2 | cluster_3 | 2.162 | 1.380 | 0.782 | 0.162 | 0.000** |
| HDL-C | cluster_1 | cluster_2 | 1.343 | 1.114 | 0.228 | 0.050 | 0.000** |
| cluster_1 | cluster_3 | 1.343 | 1.267 | 0.076 | 0.041 | 0.065 |
| cluster_2 | cluster_3 | 1.114 | 1.267 | -0.153 | 0.053 | 0.004** |
| LDL-C | cluster_1 | cluster_2 | 2.781 | 2.675 | 0.106 | 0.139 | 0.447 |
| cluster_1 | cluster_3 | 2.781 | 2.690 | 0.090 | 0.115 | 0.432 |
| cluster_2 | cluster_3 | 2.675 | 2.690 | -0.016 | 0.150 | 0.916 |
| ApoA1 | cluster_1 | cluster_2 | 1.640 | 1.498 | 0.142 | 0.045 | 0.002** |
| cluster_1 | cluster_3 | 1.640 | 1.549 | 0.092 | 0.037 | 0.014* |
| cluster_2 | cluster_3 | 1.498 | 1.549 | -0.051 | 0.048 | 0.295 |
| ApoB | cluster_1 | cluster_2 | 0.851 | 0.858 | -0.007 | 0.037 | 0.842 |
| cluster_1 | cluster_3 | 0.851 | 0.815 | 0.036 | 0.031 | 0.242 |
| cluster_2 | cluster_3 | 0.858 | 0.815 | 0.043 | 0.040 | 0.278 |
| Lp(a) | cluster_1 | cluster_2 | 231.392 | 116.558 | 114.834 | 37.849 | 0.003** |
| cluster_1 | cluster_3 | 231.392 | 162.368 | 69.023 | 31.219 | 0.028* |
| cluster_2 | cluster_3 | 116.558 | 162.368 | -45.810 | 40.637 | 0.261 |
| Glucose | cluster_1 | cluster_2 | 5.466 | 5.900 | -0.434 | 0.155 | 0.006** |
| cluster_1 | cluster_3 | 5.466 | 5.351 | 0.115 | 0.128 | 0.371 |
| cluster_2 | cluster_3 | 5.900 | 5.351 | 0.549 | 0.166 | 0.001** |
| hs-CRP | cluster_1 | cluster_2 | 1.640 | 1.677 | -0.036 | 0.420 | 0.931 |
| cluster_1 | cluster_3 | 1.640 | 1.127 | 0.514 | 0.347 | 0.140 |
| cluster_2 | cluster_3 | 1.677 | 1.127 | 0.550 | 0.451 | 0.224 |
| Sodium | cluster_1 | cluster_2 | 139.683 | 139.186 | 0.497 | 0.398 | 0.213 |
| cluster_1 | cluster_3 | 139.683 | 139.000 | 0.683 | 0.328 | 0.038* |
| cluster_2 | cluster_3 | 139.186 | 139.000 | 0.186 | 0.427 | 0.664 |
| Potassium | cluster_1 | cluster_2 | 4.264 | 4.316 | -0.052 | 0.058 | 0.367 |
| cluster_1 | cluster_3 | 4.264 | 4.232 | 0.032 | 0.048 | 0.503 |
| cluster_2 | cluster_3 | 4.316 | 4.232 | 0.084 | 0.062 | 0.176 |
| Chloride | cluster_1 | cluster_2 | 105.183 | 105.023 | 0.160 | 0.436 | 0.714 |
| cluster_1 | cluster_3 | 105.183 | 104.539 | 0.644 | 0.360 | 0.075 |
| cluster_2 | cluster_3 | 105.023 | 104.539 | 0.484 | 0.468 | 0.302 |
| Cystatin C | cluster_1 | cluster_2 | 0.894 | 0.957 | -0.063 | 0.035 | 0.069 |
| cluster_1 | cluster_3 | 0.894 | 0.930 | -0.036 | 0.028 | 0.209 |
| cluster_2 | cluster_3 | 0.957 | 0.930 | 0.027 | 0.037 | 0.465 |
| Iron | cluster_1 | cluster_2 | 19.023 | 19.128 | -0.105 | 0.974 | 0.915 |
| cluster_1 | cluster_3 | 19.023 | 21.328 | -2.304 | 0.803 | 0.005** |
| cluster_2 | cluster_3 | 19.128 | 21.328 | -2.200 | 1.046 | 0.036* |
| Magnesium | cluster_1 | cluster_2 | 0.901 | 0.900 | 0.001 | 0.011 | 0.956 |
| cluster_1 | cluster_3 | 0.901 | 0.892 | 0.009 | 0.009 | 0.316 |
| cluster_2 | cluster_3 | 0.900 | 0.892 | 0.008 | 0.011 | 0.472 |
| Height (cm) | cluster_1 | cluster_2 | 157.768 | 167.814 | -10.046 | 1.182 | 0.000** |
| cluster_1 | cluster_3 | 157.768 | 168.158 | -10.390 | 0.975 | 0.000** |
| cluster_2 | cluster_3 | 167.814 | 168.158 | -0.344 | 1.269 | 0.787 |
| Weight (kg) | cluster_1 | cluster_2 | 59.440 | 73.744 | -14.304 | 1.610 | 0.000** |
| cluster_1 | cluster_3 | 59.440 | 65.961 | -6.521 | 1.328 | 0.000** |
| cluster_2 | cluster_3 | 73.744 | 65.961 | 7.784 | 1.729 | 0.000** |
| BMI | cluster_1 | cluster_2 | 23.858 | 26.135 | -2.277 | 0.466 | 0.000** |
| cluster_1 | cluster_3 | 23.858 | 23.197 | 0.660 | 0.384 | 0.087 |
| cluster_2 | cluster_3 | 26.135 | 23.197 | 2.938 | 0.500 | 0.000** |
| * *p*<0.05 ** *p*<0.01 | | | | | | | |

**Table S2. Multinomial logistic regression analysis for distinguishing different body composition phenotypes**

|  | | | | | | | |
| --- | --- | --- | --- | --- | --- | --- | --- |
| Variable | Regression Coefficient | Standard Error | *z*-Value | Wald χ2 | *p*-Value | Odds Ratio (OR) | 95% Confidence Interval for OR |
| Age | 0.008 | 0.028 | 0.272 | 0.074 | 0.786 | 1.008 | 0.953 ~ 1.065 |
| BMI | 0.161 | 0.813 | 0.198 | 0.039 | 0.843 | 1.175 | 0.239 ~ 5.776 |
| ALT | 0.012 | 0.022 | 0.561 | 0.315 | 0.575 | 1.013 | 0.969 ~ 1.057 |
| HDL-C | -2.544 | 2.139 | -1.189 | 1.414 | 0.234 | 0.079 | 0.001 ~ 5.204 |
| Glucose | 0.160 | 0.215 | 0.746 | 0.556 | 0.456 | 1.174 | 0.770 ~ 1.788 |
| Est. VAT Area (cm²) | 1.243 | 0.650 | 1.914 | 3.663 | 0.056 | 3.467 | 0.970 ~ 12.389 |
| Height (cm) | -0.021 | 0.243 | -0.089 | 0.008 | 0.929 | 0.979 | 0.608 ~ 1.575 |
| Weight (kg) | 0.089 | 0.306 | 0.289 | 0.084 | 0.772 | 1.093 | 0.599 ~ 1.992 |
| Albumin | 0.172 | 0.089 | 1.934 | 3.740 | 0.053 | 1.188 | 0.998 ~ 1.414 |
| GGT | -0.002 | 0.019 | -0.104 | 0.011 | 0.917 | 0.998 | 0.962 ~ 1.035 |
| eGFR | 0.035 | 0.019 | 1.876 | 3.519 | 0.061 | 1.036 | 0.998 ~ 1.075 |
| Triglycerides | 0.262 | 0.289 | 0.908 | 0.825 | 0.364 | 1.300 | 0.738 ~ 2.289 |
| ApoA1 | 0.004 | 2.057 | 0.002 | 0.000 | 0.998 | 1.004 | 0.018 ~ 56.593 |
| Abdominal Fat Percentage | -0.229 | 0.130 | -1.756 | 3.084 | 0.079 | 0.795 | 0.616 ~ 1.027 |
| Fat Height Percentage (kg/m²) | -0.282 | 0.494 | -0.571 | 0.326 | 0.568 | 0.754 | 0.286 ~ 1.987 |
| Abdominal-to-Hip Fat Ratio | 5.362 | 3.813 | 1.406 | 1.977 | 0.160 | 213.107 | 0.121 ~ 375246.734 |
| Trunk-to-Leg Fat Ratio | 1.227 | 5.673 | 0.216 | 0.047 | 0.829 | 3.411 | 0.000 ~ 229884.639 |
| Trunk-to-Limb Fat Mass Ratio | -1.622 | 3.395 | -0.478 | 0.228 | 0.633 | 0.198 | 0.000 ~ 153.289 |
| Est. VAT Mass (g) | -0.959 | 0.422 | -2.273 | 5.168 | 0.023 | 0.383 | 0.168 ~ 0.876 |
| Est. VAT Volume (cm³) | 0.650 | 0.382 | 1.701 | 2.892 | 0.089 | 1.915 | 0.906 ~ 4.048 |
| Whole Body Fat-Free Mass Index | -0.442 | 0.629 | -0.704 | 0.495 | 0.482 | 0.643 | 0.187 ~ 2.203 |
| Appendicular Lean Mass Index | 0.278 | 1.096 | 0.254 | 0.065 | 0.799 | 1.321 | 0.154 ~ 11.311 |
| Trunk Fat Percentage | 0.323 | 0.247 | 1.306 | 1.705 | 0.192 | 1.381 | 0.851 ~ 2.242 |
| Head Fat Percentage | 0.241 | 0.486 | 0.496 | 0.246 | 0.620 | 1.273 | 0.491 ~ 3.302 |
| ApoB | 1.325 | 1.029 | 1.288 | 1.659 | 0.198 | 3.764 | 0.501 ~ 28.274 |
| Lp(a) | -0.000 | 0.001 | -0.042 | 0.002 | 0.967 | 1.000 | 0.998 ~ 1.002 |
| Intercept | -24.563 | 44.485 | -0.552 | 0.305 | 0.581 | 0.000 | 0.000 ~ 1.5780789114056504e+27 |
| Note：McFadden *R*2 = 0.318; Cox & Snell *R*2 = 0.335; Nagelkerke *R*2 = 0.464 | | | | | | | |

**Table S3. Multicollinearity diagnostics for candidate risk factors of fatty liver disease**

|  | | |
| --- | --- | --- |
| Variable | Variance Inflation Factor (VIF) | Tolerance |
| Age | 2.228 | 0.449 |
| BMI | 106.765 | 0.009 |
| ALT | 1.435 | 0.697 |
| HDL-C | 11.742 | 0.085 |
| Glucose | 1.394 | 0.717 |
| Est. VAT Area (cm²) | 37390.086 | 0.000 |
| Height (cm) | 81.809 | 0.012 |
| Weight (kg) | 212.727 | 0.005 |
| Albumin | 1.387 | 0.721 |
| GGT | 1.581 | 0.632 |
| eGFR | 1.610 | 0.621 |
| Triglycerides | 2.119 | 0.472 |
| ApoA1 | 9.576 | 0.104 |
| Abdominal Fat Percentage | 31.521 | 0.032 |
| Fat Height Percentage (kg/m²) | 39.272 | 0.025 |
| Abdominal-to-Hip Fat Ratio | 11.793 | 0.085 |
| Trunk-to-Leg Fat Ratio | 24.281 | 0.041 |
| Trunk-to-Limb Fat Mass Ratio | 22.510 | 0.044 |
| Est. VAT Mass (g) | 325278.203 | 0.000 |
| Est. VAT Volume (cm³) | 318089.904 | 0.000 |
| Whole Body Fat-Free Mass Index | 38.740 | 0.026 |
| Appendicular Lean Mass Index | 33.123 | 0.030 |
| Trunk Fat Percentage | 80.349 | 0.012 |
| Head Fat Percentage | 1.775 | 0.563 |
| ApoB | 1.421 | 0.704 |
| Lp(a) | 1.259 | 0.795 |

**Table S4. Variable selection grouping based on multicollinearity and clinical significance**

| Cluster Groups | Number of Variables in Group | Representative Variable | Degree of Collinearity |
| --- | --- | --- | --- |
| 1. Visceral Fat Deposition Group | 3 | Est. VAT Area (cm²) | Extreme Collinearity (VIF > 30,000) |
|  |  | Est. VAT Mass (g) | Perfect Collinearity |
|  |  | Est. VAT Volume (cm³) | Perfect Collinearity |
| 2. Overall Adiposity & Body Composition Group | 5 | Weight (kg) | High Correlation (VIF > 80) |
|  |  | BMI | High Correlation |
|  |  | Height (cm) | High Correlation |
|  |  | WB-FFMI | Moderate Correlation |
|  |  | ALMI | Moderate Correlation |
| 3. Fat Distribution & Body Fat Percentage Group | 7 | A/H Ratio | High Correlation  (VIF>10) |
|  |  | Abdominal Fat % | High Correlation |
|
|  |  | Trunk Fat % | High Correlation |
|  |  | Trunk/Leg Fat % Ratio | High Correlation |
|  |  | Trunk/Limb Fat Mass Ratio | High Correlation |
|  |  | Fat Height % (kg/m²) | Moderate Correlation |
|  |  | Head Fat % | Low Correlation |
| 4. Dyslipidemia Group | 5 | Triglycerides | Moderate Correlation  (VIF≈2) |
|  |  | HDL-C | Moderate Correlation |
|
|  |  | ApoA1 | High Correlation |
|  |  | ApoB | Low Correlation |
|  |  | Lp(a) | Independent |
| 5. Hepato-Renal & Metabolic Function Group | 6 | Age | Independent |
|  |  | ALT | Low Correlation |
|  |  | GGT | Independent |
|
|  |  | Albumin | Independent |
|  |  | eGFR | Independent |
|  |  | Glucose | Independent |
|
